# Supplementary material
Source: HighWire-hosted journal article supplement (http://jneurosci.org/highwire/filestream/599447/field_highwire_adjunct_files/3/table_2.pdf)
Supplement: table_2.pdf [file table_2.pdf]

| <b>Effect</b>                                                      | <b>Type</b>       | <b>F</b>           | <b>p</b>     |
|--------------------------------------------------------------------|-------------------|--------------------|--------------|
| Self<br>(self-related: 11.4±1.8ms<br>non self-related: 13.5±1.8ms) | Main effect       | $F_{(1,13)} = 1.9$ | $p = 0.2$    |
| aMTT × Self                                                        | Interaction       | $F_{(2,26)} = 1.5$ | $p = 0.24$   |
| aMTT: Past vs. Now                                                 | Scheffe Post-hocs |                    | $P = 0.02^*$ |
| aMTT: Past vs. Future                                              | Scheffe Post-hocs |                    | $P = 0.88$   |
| aMTT: Now vs. Future                                               | Scheffe Post-hocs |                    | $P < 0.01^*$ |
| rMTT - Past:                                                       | Scheffe Post-hocs |                    | $P = 0.3$    |
| rMTT - Now:                                                        | Scheffe Post-hocs |                    | $P = 0.5$    |
| rMTT - Future:                                                     | Scheffe Post-hocs |                    | $P = 0.04^*$ |

Supplementary Table 2. Statistical results and post-hoc tests for ERs.
